# Supplementary material for: Assisted Reproductive Technologies (Art) Equity, Justice and Autonomy in Ghana
Source: Research Square preprint supplement (doi:10.21203/rs.3.rs-6180416/v1), 2025-03-25
Supplement: Supplementary file 1 [file b714ff8fb2d0fd5800d7eb51.docx]

This study is aimed at documenting the spectrum of available ART services and the barriers to accessing those services in Ghana. It will take you no more than 5 minutes to respond to the questions. You can be assured that your responses will be confidential, and your identity will not be captured or disclosed. Thank you for responding to our questions.

QUESTIONNAIRE FOR ART CLINICAL STAFF

ACCESS TO ART IN GHANA

DEMOGRAPHIC INFORMATION

1. AGE __________
2. 21 – 30
3. 31 – 35
4. 36 – 40
5. 41 – 45
6. 46 - 50
7. 50 - 60
8. above 60
9. SEX: MALE _________ FEMALE ________
10. CLINICAL ROLE IN THE ART CLINIC
11. Reproductive Endocrinology Sub-specialist
12. Obstetrician and Gynaecologist
13. Embryologist
14. Physician Assistant
15. Fertility Nurse
16. Clinical psychologist
17. Administrator
18. Other (Specify) _____
19. HIGHEST LEVEL OF EDUCATION
20. Clinical Fellowship
21. PhD
22. Membership
23. Post-Graduate Masters
24. Post-Graduate Diploma
25. MBChB
26. Degree in Biomedical Sciences, Laboratory Technology
27. Degree in Nursing/Midwifery
28. Degree in Psychology
29. Diploma in Nursing/Midwifery
30. Diploma in Perioperative Nursing
31. Nurse Assistant- Clinical (NAC)
32. Other (Specify) ____________
33. HIGHEST LEVEL OF PROFESSIONAL TRAINING IN ART
34. Fellowship
35. PhD
36. Post Graduate Masters
37. Post Graduate Diploma
38. Six Months Observership
39. Three (3) Months Observership
40. Training on the Job (Mentorship)
41. Other (Specify) _____________
42. WHAT WAS YOUR CHALLENGE FOR TRAINING
43. Difficulty with travelling abroad for training
44. Difficulty financing training
45. Few opportunities available for training
46. Difficulty finding mentors
47. COUNTRY OF TRAINING IN ART (State)
48. DURATION OF ART PRACTICE

State number of years ___________

1. EVER BEEN INVOLVED OR OFFERED ANY OF THE FOLLOWING SERVICES?

(clinicians only)

1. IVF for single women
2. Use of donor gametes
3. Commercial surrogacy
4. Intra-familial donor insemination
5. Embryo adoption
6. Sex selection
7. Multifetal pregnancy reduction
8. Pre-implantation genetic diagnosis (PGD)
9. Cryopreservation and transfer of frozen-thawed embryo (FET)
10. Posthumous Embryo Transfer
11. WILL YOU PREFER A MORE RESTRICTIVE AND REGULATED ART ENVIRONMENT? ( clinicians only)
12. Yes
13. No
14. WHAT, IN YOUR OPINION, CONSTITUTES THE GREATEST BARRIER TO ART IN GHANA?
15. Poor knowledge of the availability of the services by patients
16. Religious beliefs of patients
17. Cultural inhibitions
18. Financial constraints in setting up centres
19. High cost of services
20. Difficulty with locations of clinics
21. Non-availability of facilities
22. Non-availability of trained ART professionals

This study is aimed at documenting the spectrum of available ART services and the barriers to accessing those services in Ghana. Responding to the questions will take you no more than 5 minutes. You can be assured that your responses will be confidential, and your identity will not be captured or disclosed. Thank you for responding to our questions.

QUESTIONNAIRE FOR ART PATIENTS

1. Age (years) ________
2. 21 – 25
3. 26 – 30
4. 31 – 35
5. 36 - 40
6. 41 - 45
7. 46 - 50
8. more than 50
9. Religion
10. Christian
11. Moslem
12. Traditionalist
13. Other
14. Marital Status
15. Single
16. Married
17. In a relationship
18. Widowed
19. Divorced
20. If married, number of years of marriage: state ____________
21. less than 2 years
22. 2 – 5 years
23. 6 – 10 years
24. 11 - 20 years
25. more than 20 years
26. Number of years of infertility: State
27. less than 2 years
28. 2 – 5 years
29. 6 – 10 years
30. 11 - 20 years
31. more than 20 years
32. Do you live together with your partner?
33. Yes
34. No
35. If no to the above, where does the partner live?
36. Abroad
37. In Ghana, but different city or town
38. In the same City but in different suburbs
39. How did you hear of the clinic’s services?
40. Recommendation from a friend, family or colleague who has patronized the services
41. Recommendation from a friend or family who has heard about the hospital but has not patronized it himself/herself
42. Hospital website
43. Hospital social media handle
44. Radio
45. Newspaper
46. Other (specify)
47. What was the cause of your infertility? (can select more than one option)
48. Advanced age
49. Anovulation
50. Fibroids
51. Adenomyosis
52. Tubal blockage
53. Abnormal semen parameters
54. Unexplained
55. What treatments were offered to you?
56. Ovulation induction and timed intercourse
57. Ovulation induction and intrauterine insemination (IUI)
58. In-vitro fertilisation (IVF)
59. Intra-Cytoplasmic Sperm Injection (ICSI)
60. Have you had any of the treatments (ART) before?
61. Yes
62. No
63. If yes, which one? State _________
64. When was the last time you visited the clinic? / How long ago did you last visit the clinic? State in months _____
65. More than 6 months ago
66. 7 months to 12 months
67. 13 – 24 months
68. more than 24 months
69. What has been your reason for not returning for the treatment recommended? State as many as possible
70. The cost of treatment is too high
71. We can afford the treatment, but we do not like the care at the clinic
72. My partner is not available for the treatment.
73. We have found another place where we prefer to have the treatment
74. The clinic is too far from where we live
75. Our religion does not support the treatment being offered
76. Our pastor or Imam has advised against the treatment
77. It will be against our culture
78. We already have a child or children and are no longer keen on the treatment
